# Supplementary material for: Biofouling of leisure boats as a source of metal pollution
Source: PubMed Central journal article supplement (PMC5219026; doi:10.1007/s11356-016-7883-7), 2016-10-20
Supplement: 11356_2016_7883_MOESM1_ESM.pdf [file 11356_2016_7883_MOESM1_ESM.pdf]

# Biofouling of leisure boats as a source of metal pollution

Environmental Science and Pollution Research

Maria Alexandra Bighiu<sup>1\*</sup>, Ann-Kristin Eriksson Wiklund<sup>1</sup>, Britta Eklund<sup>1</sup>

<sup>1</sup>Department of Environmental Science and Analytical Chemistry, Stockholm University, Sweden

\* corresponding author: maria.bighiu@aces.su.se, Svante Arrhenius väg 8, SE-10691, Stockholm, Sweden, phone +46 8 674 7609

## Supplementary information

### A. Questionnaire (adapted from Swedish)

*Q1. How satisfied are you with the aspect of the boat hull as regards fouling? Rank from 1-5 (not satisfied-very satisfied).*

Rate of response: 91.2 %

Average grade: 3.85 ± 1.15

*Q2. What type of antifouling paint did you use in the last season?*

Rate of response: 95.1 %

- Copper paints: 41.2 %
- Zinc paints: 27.8 %
- No paint: 15.5 %
- Other (biocide free paints including epoxy) 7.2 %
- Unknown 8.2 %

*Q3. How many litres of antifouling paint did you use in the last season?*

Rate of response: 90.2 %

- Copper: 2.4 ± 1.8 L
- Zn 2.2 ± 1.2 L
- Other: 0.82 ± 1.09 L

*Q4. Did you use any kind of boat washer in the last season (e.g. manual or industrial)?*

Rate of response: 100%

- Yes: 22 %
- No: 78 %

*Q5. How many labour hours did you put in the boat maintenance in the last season?*

Rate of response: 93.1 %

- Average  $9.3 \pm 17.7$  h

*Q6. How much money did you invest in boat maintenance activities?*

Rate of response: 88.2 %

- Average  $936.7 \pm 1210$  Swedish Crowns

*Q7. Which was the main area in which you have sailed in the last season?*

Rate of response: 98 %

- Only inner Stockholm archipelago: 38 %
- Only middle Stockholm archipelago: 12 %
- Only outer Stockholm archipelago: 11 %
- Inner, middle, outer and/or other areas nearby Stockholm: 39 %

*Q8. Which was the home harbour for the boat?*

Rate of response: 96 %

- Brunnsviken: 24.5 %
- Ekhagen: 29.6 %
- Hundudden: 36.7 %
- Other: 9.2 %

*Q9. How many days did you sail in the last season?*

Rate of response: 97 %

- Average  $13.8 \pm 11.8$  days

*Q10. How was the boat positioned in the harbour (according to the stern)?*

Rate of response: 92.1 %

- E: 24.5 %
- W: 26.6 %
- N: 10.6 %
- NE and NW: 14.9 %
- S: 13.8 %
- SE and SW: 9.6 %

Q11. How old is your boat?

Rate of response: 97 %

- Average 35.44 ± 14.3 years

In addition, we made observations of hull colour and type of boat (motor or sailing boat).

## B. Colour panels experiment

**Table 3.** Multiple comparisons of the densities of the three groups of macrofoulers between the different substratum colours tested. Only the significant differences are shown, obtained using the nonparametric Steel-Dwass method ( $\alpha=0.05$ )

| Position   | <i>Balanus improvisus</i> |         | Ostracods         |         | <i>Cerastoderma glaucum</i> |         |
|------------|---------------------------|---------|-------------------|---------|-----------------------------|---------|
|            | colors                    | p value | colors            | p value | colors                      | p value |
| South-East | transparent-red           | 0.0125  | transparent-black | 0.0004  | white-black                 | 0.048   |
|            | transparent-black         | 0.0154  | white-black       | 0.0006  | white-blue                  | 0.0058  |
|            |                           |         | black-red         | <0.0001 |                             |         |
|            |                           |         | blue-red          | 0.0464  |                             |         |
|            |                           |         | blue-black        | 0.0121  |                             |         |
| North-East | transparent-red           | 0.0316  | black-red         | <0.0001 |                             |         |
|            | transparent-black         | 0.0284  | black-transparent | 0.0001  |                             |         |
|            |                           |         | black-white       | 0.0027  |                             |         |
|            |                           |         | blue-red          | 0.0335  |                             |         |
|            |                           |         | blue-transparent  | 0.0468  |                             |         |

**Table 4.** Average metal concentrations in the plastic panels, measured by XRF (N=5 for each colour); nd is not detected

| Panel colour | Cu      |        | Zn      |        | Sn      |
|--------------|---------|--------|---------|--------|---------|
|              | average | st dev | average | st dev | average |
| black        | 90.76   | 4.74   | 1.79    | 1.57   | nd      |
| blue         | 109.31  | 2.92   | 11.09   | 1.19   | nd      |
| red          | 71.46   | 2.02   | 17.84   | 0.72   | nd      |
| white        | 78.69   | 8.26   | 2.43    | 3.75   | nd      |
